# Supplementary material
Source: publisher figshare collection journal article supplement (https://frontiersin.figshare.com/ndownloader/files/20325525)
Supplement: Supplementary file [file 20325525]

## *Supplementary Material*

### **1 Supplementary Figures and Tables**

#### **1.1 Supplementary Figures**

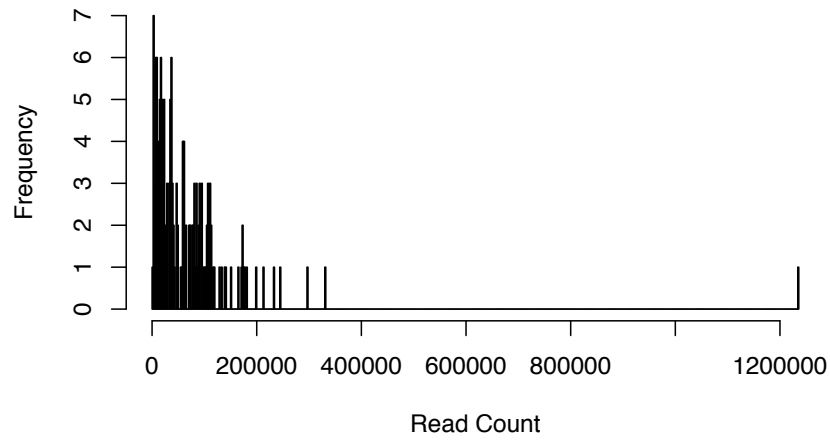

**Supplementary Figure 1.** Histogram of read counts per sample for microbial sequencing data.

## 1.2 Supplementary Tables.

**Table S1. Comparison of subject characteristics between all study subjects and subsets used for multivariate and sensitivity analyses.**

| Variable <sup>a</sup>              | <i>N</i> = 155        |    | <i>N</i> = 123        |    | <i>N</i> = 92         |    |
|------------------------------------|-----------------------|----|-----------------------|----|-----------------------|----|
|                                    | N (%) or Mean [Range] | NA | N (%) or Mean [Range] | NA | N (%) or Mean [Range] | NA |
| Age                                | 32.4 [20 - 45]        |    | 32.7 [23 - 44]        |    | 32.9 [23 - 44]        |    |
| Race                               |                       | 5  |                       | 1  |                       |    |
| White                              | 3 (1.9)               |    | 2 (1.6)               |    | 2 (2.2)               |    |
| Other                              | 147 (94.8)            |    | 120 (97.6)            |    | 90 (97.8)             |    |
| Relationship status                |                       | 13 |                       | 6  |                       | 2  |
| Married                            | 126 (81.3)            |    | 106 (86.2)            |    | 84 (91.3)             |    |
| Separated or divorced              | 4 (2.6)               |    | 4 (3.3)               |    | 2 (2.2)               |    |
| Single and never married           | 12 (7.7)              |    | 7 (5.7)               |    | 4 (4.3)               |    |
| Smoking history                    |                       | 14 |                       | 7  |                       | 2  |
| No                                 | 126 (81.3)            |    | 105 (85.4)            |    | 82 (89.1)             |    |
| Yes                                | 15 (9.7)              |    | 11 (8.9)              |    | 8 (8.7)               |    |
| Prepregnancy BMI                   | 26 [17.4 - 47.8]      | 17 | 26.1 [17.6 - 47.8]    |    | 26.1 [18 - 47.8]      |    |
| Weight gain during pregnancy (lbs) | 32.7 [4 - 63]         | 17 | 32.7 [4 - 63]         |    | 32.5 [4 - 63]         |    |
| Weight gain category               |                       | 32 |                       |    |                       |    |
| Less                               | 23 (14.8)             |    | 23 (18.7)             |    | 20 (21.7)             |    |
| Recommended                        | 36 (23.2)             |    | 36 (29.3)             |    | 26 (28.3)             |    |
| More                               | 64 (41.3)             |    | 64 (52)               |    | 46 (50)               |    |
| Parity                             | 1.8 [1 - 5]           | 3  | 1.7 [1 - 5]           |    | 1.7 [1 - 5]           |    |
| Delivery mode                      |                       | 13 |                       | 6  |                       | 4  |
| Vaginal                            | 101 (65.2)            |    | 80 (65)               |    | 61 (66.3)             |    |
| Elective Cesarean section          | 22 (14.2)             |    | 19 (15.4)             |    | 14 (15.2)             |    |
| Nonelective Cesarean section       | 19 (12.3)             |    | 18 (14.6)             |    | 13 (14.1)             |    |
| Gestational diabetes               |                       | 22 |                       | 6  |                       | 4  |
| No                                 | 125 (80.6)            |    | 110 (89.4)            |    | 83 (90.2)             |    |
| Yes                                | 8 (5.2)               |    | 7 (5.7)               |    | 5 (5.4)               |    |

|                                                          |                  |    |                  |    |                |   |
|----------------------------------------------------------|------------------|----|------------------|----|----------------|---|
| Maternal antibiotics by 4-months postpartum <sup>2</sup> |                  | 25 |                  | 17 |                |   |
| No                                                       | 113 (72.9)       |    | 92 (74.8)        |    | 92 (100)       |   |
| Yes                                                      | 17 (11)          |    | 14 (11.4)        |    | 0 (0)          |   |
| Peripartum antibiotics                                   |                  | 15 |                  | 8  |                | 5 |
| No                                                       | 69 (44.5)        |    | 54 (43.9)        |    | 39 (42.4)      |   |
| Yes                                                      | 71 (45.8)        |    | 61 (49.6)        |    | 48 (52.2)      |   |
| Infant feeding behavior                                  |                  | 24 |                  | 15 |                |   |
| Exclusively breastfed                                    | 109 (70.3)       |    | 87 (70.7)        |    | 75 (81.5)      |   |
| Combination fed                                          | 22 (14.2)        |    | 21 (17.1)        |    | 17 (18.5)      |   |
| Gestational age at delivery                              | 39.2 [30 - 42.4] |    | 39.2 [30 - 42.4] |    | 39 [30 - 42.1] |   |
| Infant sex                                               |                  | 8  |                  | 6  |                | 4 |
| Female                                                   | 73 (47.1)        |    | 57 (46.3)        |    | 41 (44.6)      |   |
| Male                                                     | 74 (47.7)        |    | 60 (48.8)        |    | 47 (51.1)      |   |
| Postpartum collection week                               | 6.6 [3.7 - 12]   |    | 6.6 [4.1 - 12]   |    | 6.6 [4.1 - 12] |   |

<sup>a</sup>The Kruskal Wallis rank-sum test or Fisher's exact test was used to test for differences in subject characteristics between groups

<sup>b</sup>Only postpartum antibiotic exposure differed significantly between groups

**Table S2. Associations between maternal characters and BMT membership using multinomial logistic regression models**

| Variable                                    | BMT1 vs. BMT2     | OR (95% CI) <sup>a</sup> |                   |
|---------------------------------------------|-------------------|--------------------------|-------------------|
|                                             |                   | BMT3 vs. BMT2            | BMT4 vs. BMT2     |
| Prepregnancy BMI                            | 1.10 (1.01, 1.20) | 1.11 (1.01, 1.22)        | 1.01 (0.91, 1.13) |
| Weight gain during pregnancy (per 10 lbs)   | 0.64 (0.43, 0.95) | 1.08 (0.71, 1.65)        | 0.80 (0.53, 1.21) |
| Parity                                      | 0.99 (0.57, 1.73) | 1.74 (1.02, 2.97)        | 1.49 (0.87, 2.54) |
| Delivery mode                               |                   |                          |                   |
| Vaginal (reference)                         |                   |                          |                   |
| Elective Cesarean section                   | 1.74 (0.49, 6.14) | 2.28 (0.63, 8.23)        | 0.72 (0.16, 3.28) |
| Nonelective Cesarean section                | 0.93 (0.29, 3.03) | 0.61 (0.14, 2.59)        | 0.30 (0.06, 1.53) |
| Maternal prenatal antibiotics               | 1.07 (0.33, 3.44) | 0.68 (0.16, 2.94)        | 1.35 (0.39, 4.64) |
| Maternal peripartum antibiotics             | 0.65 (0.27, 1.56) | 1.17 (0.45, 3.08)        | 0.48 (0.19, 1.23) |
| Maternal antibiotics by 4-months postpartum | 0.69 (0.18, 2.68) | 0.73 (0.16, 3.22)        | 0.76 (0.19, 2.98) |
| Gestational age at delivery                 | 0.87 (0.70, 1.07) | 0.97 (0.76, 1.24)        | 1.06 (0.83, 1.37) |
| Postpartum collection week                  | 1.10 (0.70, 1.72) | 1.23 (0.76, 1.98)        | 1.50 (0.96, 2.33) |
| OR (95% CI) <sup>b</sup>                    |                   |                          |                   |
| Variable                                    | BMT1 vs. BMT2     | BMT3 vs. BMT2            | BMT4 vs. BMT2     |
| Prepregnancy BMI                            | 1.13 (1.02, 1.24) | 1.12 (1.01, 1.25)        | 1.05 (0.94, 1.18) |
| Weight gain during pregnancy (per 10 lbs)   | 0.66 (0.44, 1.00) | 1.20 (0.77, 1.88)        | 0.78 (0.49, 1.24) |
| Parity                                      | 0.84 (0.44, 1.58) | 1.57 (0.81, 3.04)        | 1.37 (0.71, 2.64) |
| Postpartum collection week                  | 1.25 (0.73, 2.11) | 1.54 (0.87, 2.72)        | 1.72 (1.00, 2.95) |
| OR (95% CI) <sup>c</sup>                    |                   |                          |                   |
| Variable                                    | BMT1 vs. BMT2     | BMT3 vs. BMT2            | BMT4 vs. BMT2     |
| Prepregnancy BMI                            | 1.09 (0.98, 1.20) | 1.08 (0.97, 1.20)        | 0.97 (0.85, 1.11) |
| Weight gain during pregnancy (per 10 lbs)   | 0.62 (0.38, 1.01) | 1.17 (0.71, 1.94)        | 0.63 (0.36, 1.09) |
| Parity                                      | 0.75 (0.37, 1.54) | 0.98 (0.44, 2.19)        | 1.09 (0.50, 2.37) |
| Postpartum collection week                  | 1.41 (0.75, 2.65) | 1.60 (0.83, 3.09)        | 1.81 (0.96, 3.41) |

<sup>a</sup>Univariate analyses

<sup>b</sup>Analyses adjusted for prepregnancy BMI, weight gain during pregnancy, parity, and postpartum collection week (n = 123)

°Analyses restricted to women known to have not received antibiotics before 4 months postpartum, and adjusted for prepregnancy BMI, weight gain during pregnancy, parity, and postpartum collection week (n = 92)

**Table S3. Breast milk alpha diversity associations**

| <b>Variable</b>                             | <b>Coefficient<sup>a</sup></b> | <b>p-value<sup>a</sup></b> |
|---------------------------------------------|--------------------------------|----------------------------|
| Age                                         | -0.0094                        | 0.69                       |
| Prepregnancy BMI                            | -0.016                         | 0.43                       |
| Weight gain during pregnancy (per 10 lbs)   | 0.21                           | 0.039                      |
| Parity                                      | -0.016                         | 0.90                       |
| Delivery mode                               |                                |                            |
| Vaginal (reference)                         |                                |                            |
| Elective cesarean section                   | 0.26                           | 0.43                       |
| Nonelective cesarean section                | 0.15                           | 0.66                       |
| Maternal prenatal antibiotics               | 0.16                           | 0.61                       |
| Maternal peripartum antibiotics             | 0.33                           | 0.16                       |
| Maternal antibiotics by 4-months postpartum | 0.78                           | 0.034                      |
| Infant feeding behavior                     |                                |                            |
| Exclusively breastfed (reference)           |                                |                            |
| Combination fed                             | 0.11                           | 0.74                       |
| Gestational age at delivery                 | 0.013                          | 0.82                       |
| Infant sex                                  |                                |                            |
| Female (reference)                          |                                |                            |
| Male                                        | 0.08                           | 0.74                       |
| Postpartum collection week                  | -0.32                          | 0.0033                     |

<sup>a</sup>Univariate analyses

**Table S4. Associations with breast milk microbial community structure**

| <b>Variable</b>                             | <b><i>p</i>-value<sup>a</sup></b> |
|---------------------------------------------|-----------------------------------|
| Age                                         | 0.14                              |
| Prepregnancy BMI                            | 0.38                              |
| Weight gain during pregnancy (lbs)          | 0.076                             |
| Parity                                      | 0.060                             |
| Delivery mode                               | 0.27                              |
| Maternal prenatal antibiotics               | 0.84                              |
| Maternal peripartum antibiotics             | 0.58                              |
| Maternal antibiotics by 4-months postpartum | 0.64                              |
| Infant feeding behavior                     | 0.93                              |
| Gestational age at delivery                 | 0.15                              |
| Infant sex                                  | 0.60                              |
| Postpartum collection week                  | 0.057                             |
| <b>Variable</b>                             | <b><i>p</i>-value<sup>b</sup></b> |
| Weight gain during pregnancy (lbs)          | 0.055                             |
| Parity                                      | 0.076                             |
| Postpartum collection week                  | 0.073                             |
| <b>Variable</b>                             | <b><i>p</i>-value<sup>c</sup></b> |
| Weight gain during pregnancy (lbs)          | 0.036                             |
| Parity                                      | 0.47                              |
| Postpartum collection week                  | 0.095                             |

<sup>a</sup>Univariate analyses

<sup>b</sup>Analyses adjusted for weight gain during pregnancy, parity, and postpartum collection week (N = 123)

<sup>c</sup>Analyses restricted to women known to have not received antibiotics before 4 months postpartum, and adjusted for weight gain during pregnancy, parity, and postpartum collection week (n = 92)
